# Supplementary material for: One-component rapid Norrish Type II photoinitiation of bulk photo-CuAAC polymer networks
Source: Royal Society of Chemistry journal article supplement (doi:10.1039/d0py01310b), 2020-01-01
Supplement: d0py01310b1.pdf [file d0py01310b1.pdf]

## Electronic Supplementary Information (ESI)

### One-component rapid Norrish Type II photoinitiation of photo-CuAAC polymer networks

Abhishek U. Shete<sup>a†</sup>, Bryan P. Sutherland<sup>a†</sup>, and Christopher J. Kloxin<sup>\*ab</sup>

<sup>a</sup> Department of Materials Science and Engineering, University of Delaware, 201 Du Pont Hall, Newark, DE 19716, USA

<sup>b</sup> Department of Chemical and Biomolecular Engineering, University of Delaware, 150 Academy Street, Newark, DE 19716, USA

<sup>†</sup>Authors contributed equally

#### Contents:

|                                                                                      |   |
|--------------------------------------------------------------------------------------|---|
| Example FTIR of monomer resin and final crosslinked product .....                    | 2 |
| Solvated networks of N1 exhibiting final conversion increase from vitrification..... | 3 |
| Network polymerization with N1 and external tertiary amine .....                     | 4 |
| Hybrid network polymerization with C1 and N1 .....                                   | 5 |
| Polymerized photoCuAAC film post irradiation .....                                   | 6 |
| NMR spectroscopy of the synthesized monomers .....                                   | 7 |

### Example FTIR of monomer resin and final crosslinked product

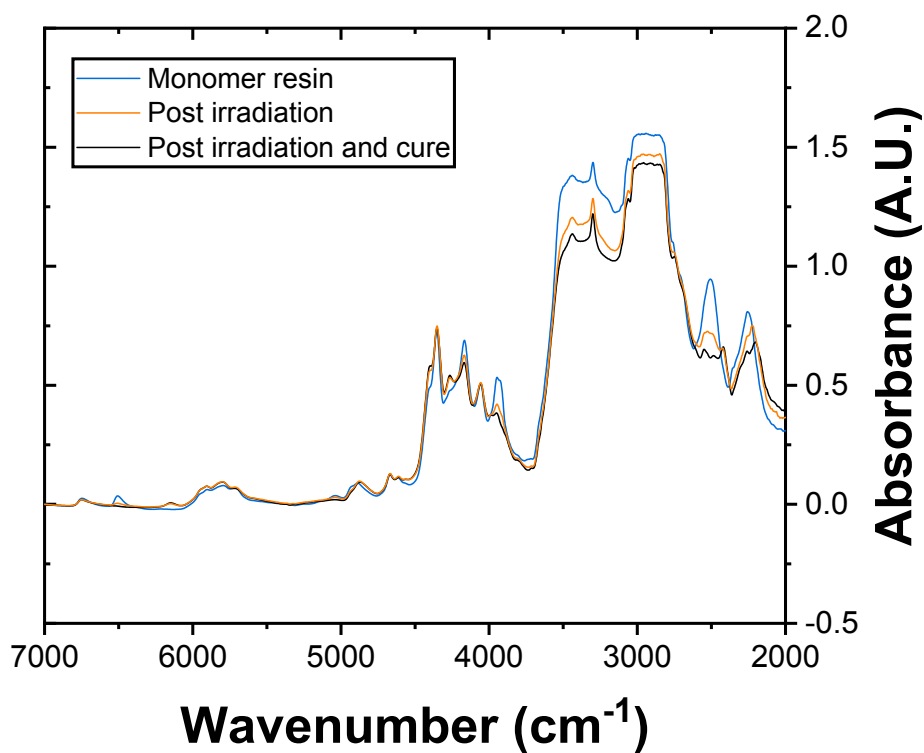

**Figure S1.** The resin contains N1 alkyne with the diazide monomer in a 1:1 functional group ratio. The formulations contain 1.5 mol% CuCl<sub>2</sub>-PMDTA 0.6 mol% CQ. The IR spectra was collected of this monomer resin prior to polymerization. The monomer resin was then irradiated using blue-light (470 nm) at 30 mW cm<sup>-2</sup> intensity and a 'post-irradiation' spectra was collected after monitoring the polymerization kinetics. Upon irradiation, a post cure was performed at 70-80 °C and the final spectrum was collected of the photo-CuAAC bulk network film.

## Solvated networks of N1 exhibiting final conversion increase from vitrification

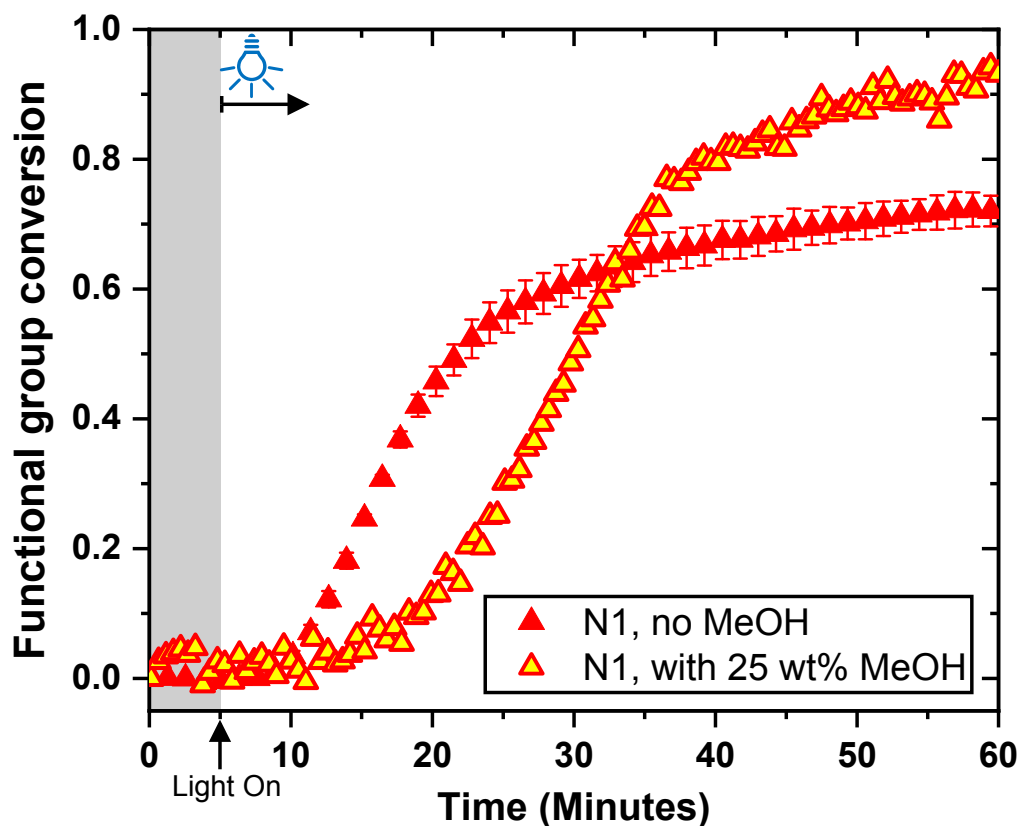

**Figure S2.** Real-time functional group conversions of photoCuAAC reaction between the diazide monomer and N1 (i.e., tripropargyl amine) in neat (red filled triangle) and 25 wt% methanol (yellow filled triangle) to assess vitrification. The formulation was mixed as described in section 2. Functional group conversions are determined using real-time near-infrared spectroscopy by monitoring the overtone of the C-H stretch of the alkyne functional group (i.e.,  $6540\text{--}6460\text{ cm}^{-1}$ ). All formulations are continuously irradiated after 5 minutes in dark (marked by the shaded region) with 470 nm blue-light at an intensity of  $30\text{ mW cm}^{-2}$ .

### Network polymerization with N1 and external tertiary amine

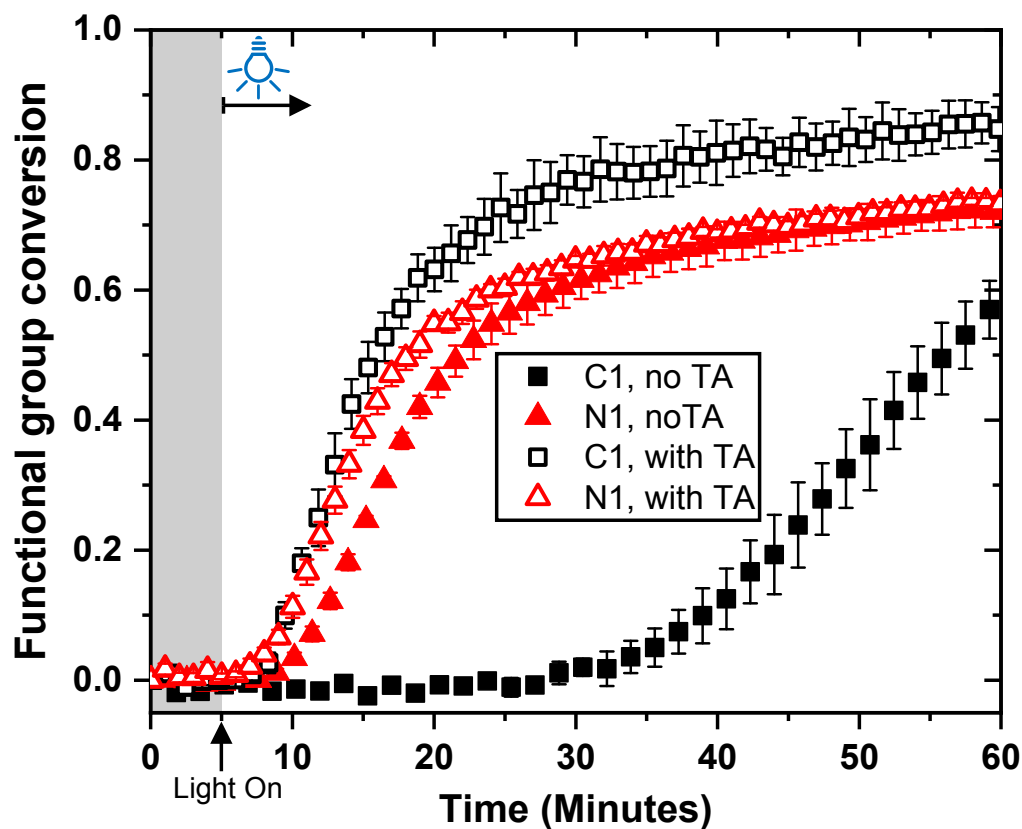

**Figure S3.** Functional group conversion of a resin containing the diazide monomer and N1 or C1 with and without the presence of a tertiary amine. Polymerization kinetics were monitored using real-time near infrared (NIR) spectroscopy. Functional group conversions are determined by monitoring the overtone in the C-H alkyne stretch ( $6540\text{-}6460\text{ cm}^{-1}$ ). All formulations are irradiated with 470 nm blue-light at  $30\text{ mW cm}^{-2}$  after 5 minutes in dark (marked by the shaded region).

## Hybrid network polymerization with C1 and N1

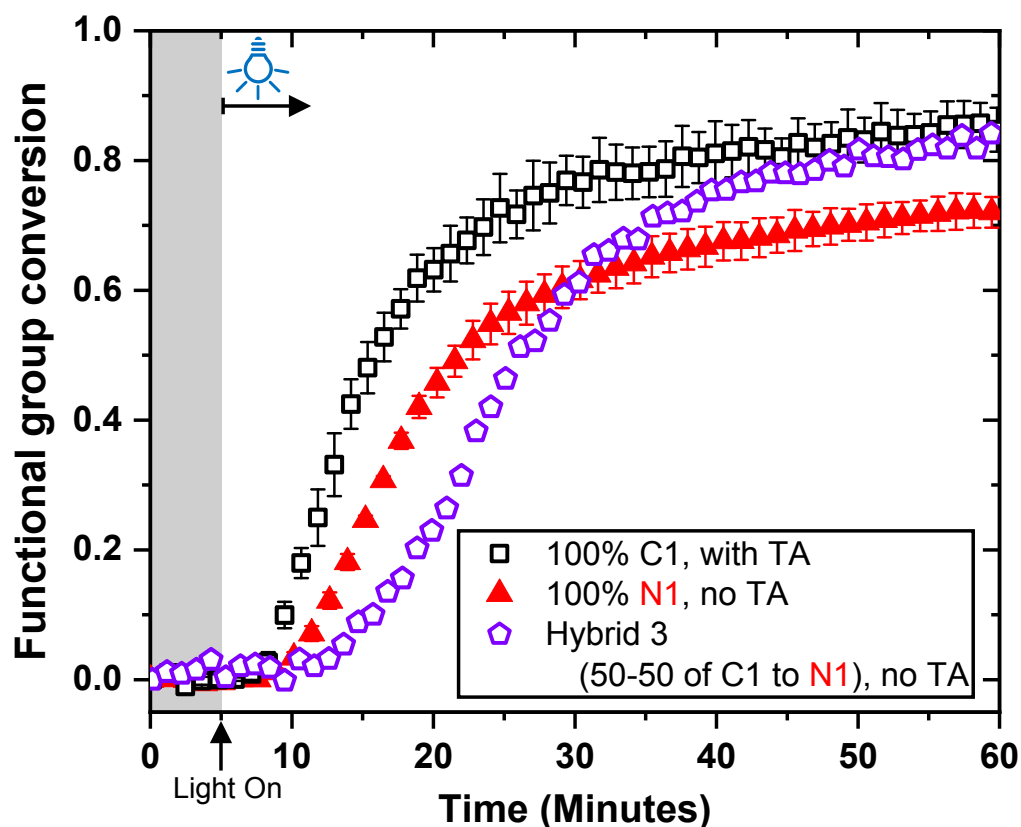

**Figure S4.** Functional group conversion for copolymerization of the diazide monomers and both C1 and N1 (i.e., a 'hybrid' system) as compared with formulations with diazide monomer and only C1 and TA or diazide monomer and only N1 and no TA. Photo-CuAAC network polymerization kinetics with hybrid networks using alkyne C1 and N1, in presence or absence of catalytic amount of accelerating amine (1.2 mol% of amine to total functional groups). Functional group conversions are determined by monitoring the C-H overtone of the alkyne ( $6540\text{--}6460\text{ cm}^{-1}$ ) functional group. All formulations are irradiated with 470 nm blue-light at  $30\text{ mW cm}^{-2}$  after 5 minutes in dark (marked by the shaded region).

### Polymerized photoCuAAC film post irradiation

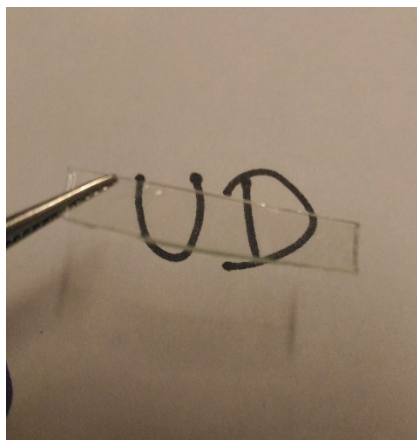

**Figure S5.** The image of a bulk photo-CuAAC network film generated using N3 alkyne and azide from **Figure 3** without the addition of TA. Irradiation was performed using 470 nm blue-light at an intensity of 30 mW/cm<sup>2</sup>. The resultant glassy material is completely defect (bubble) free and clear, evident of its transparent nature.

## NMR spectroscopy of the synthesized monomers

Note: Materials and synthetic procedures are shown in the main text.

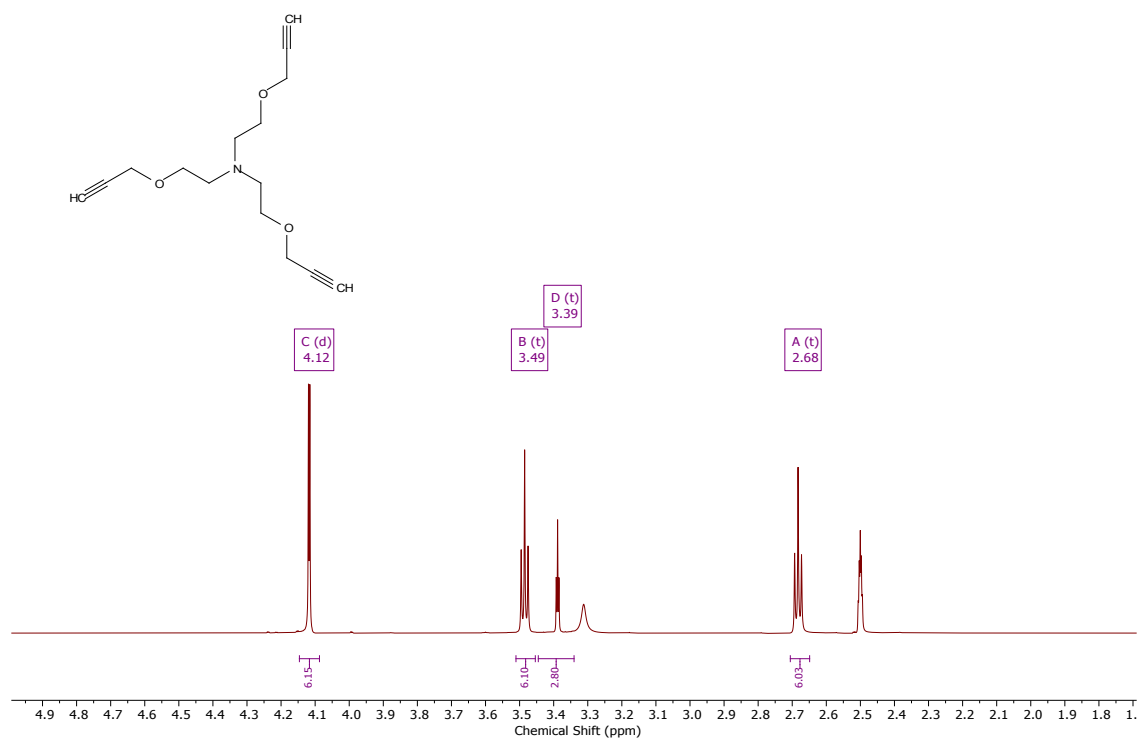

**Figure S6.** <sup>1</sup>H NMR spectrum of alkyne monomer N2

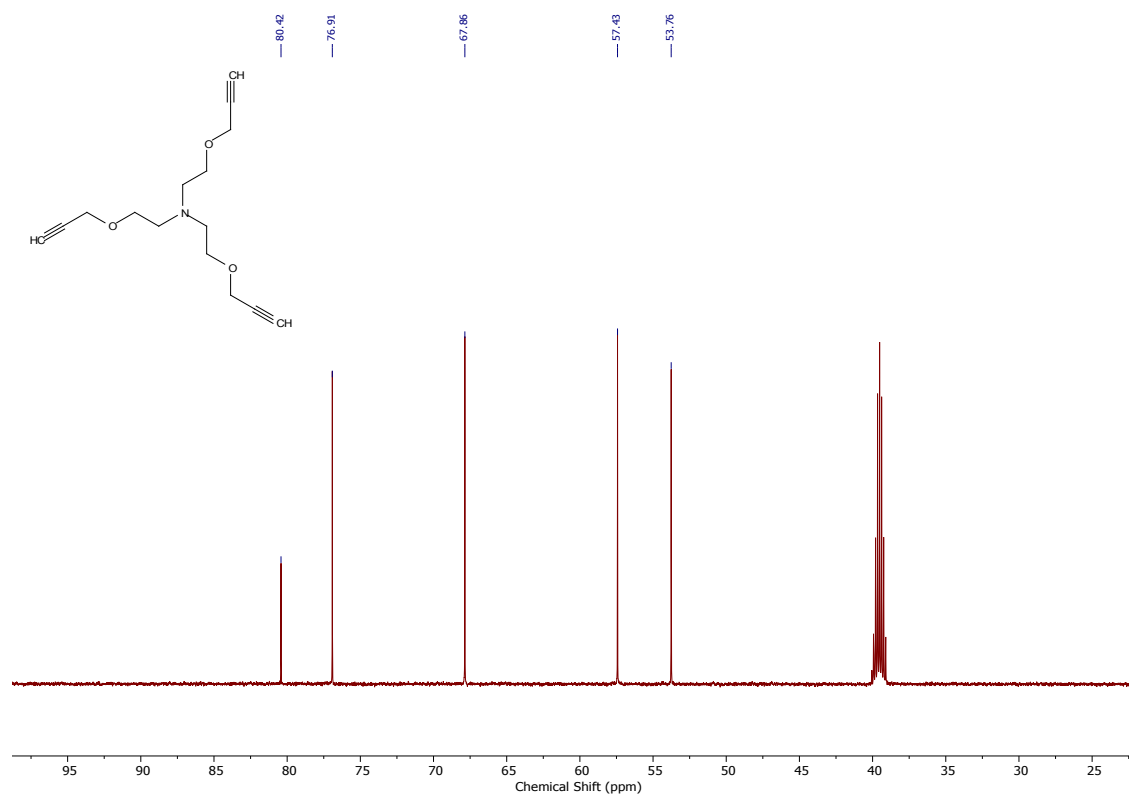

**Figure S7.**  $^{13}\text{C}$  NMR spectrum of alkyne monomer N2



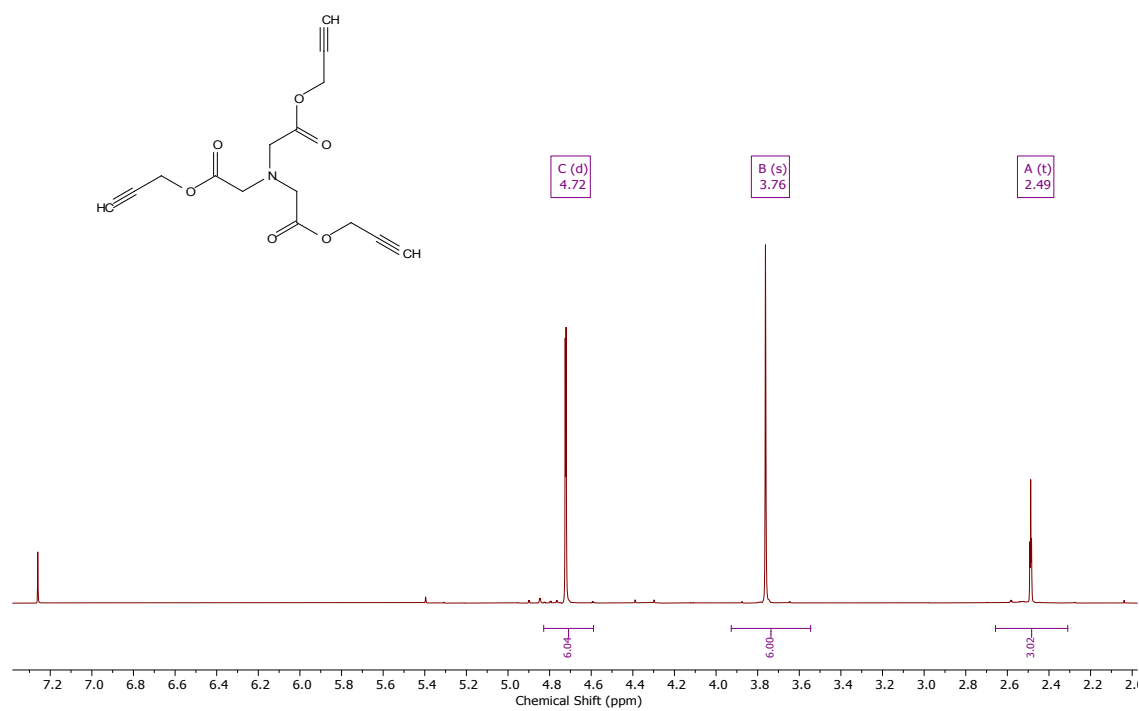

Figure S8. <sup>1</sup>H NMR spectrum of alkyne monomer N3

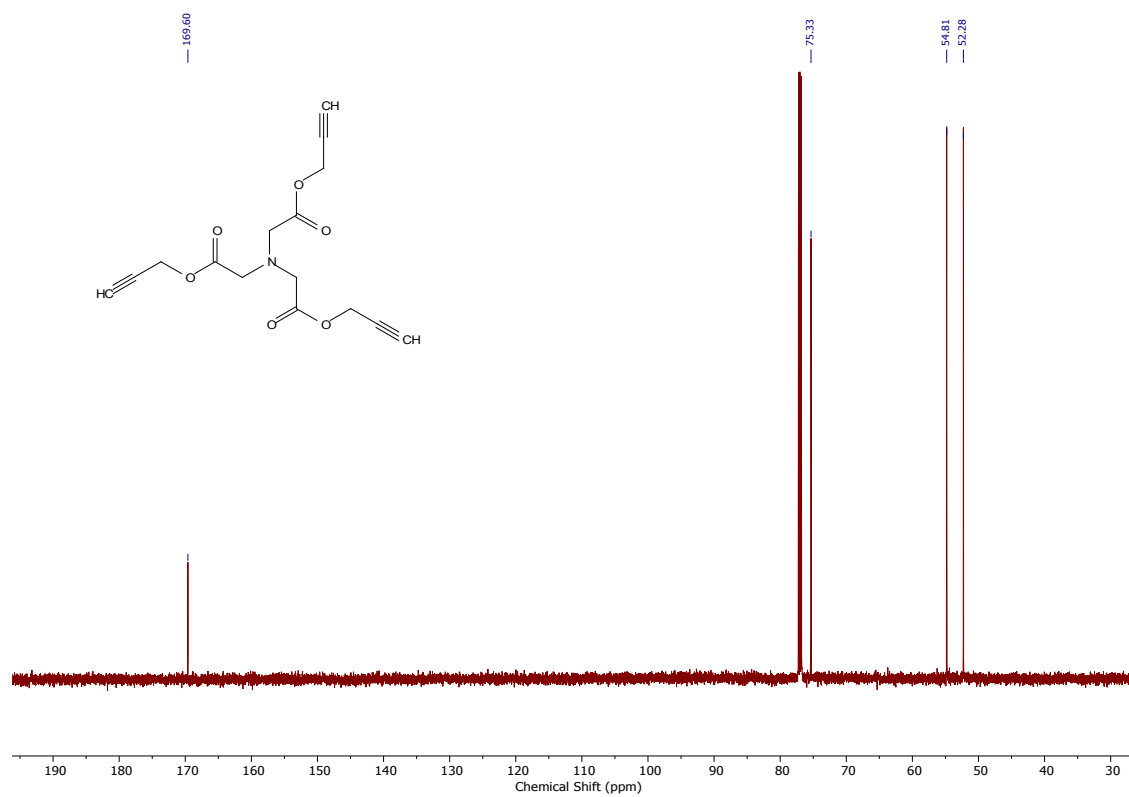

**Figure S9.** <sup>1</sup>H NMR spectrum of alkyne monomer N3
